# Supplementary material for: Peritoneal Dialysis Catheter−Fallopian Tube Fistula
Source: PubMed Central journal article supplement — Kidney Int Rep. 2020 May 21;5(8):1356–9. doi: 10.1016/j.ekir.2020.05.009 (PMC7403557; doi:10.1016/j.ekir.2020.05.009), 2020-05-21
Supplement: mmc1.pdf [file mmc1.pdf]

## Supplementary references

S1. Zemouri C, Wi TE, Kiarie J, et al. The Performance of the Vaginal Discharge Syndromic Management in Treating Vaginal and Cervical Infection: A Systematic Review and Meta-Analysis. *PLoS One*. 2016;11(10):e0163365. Published 2016 Oct 5.

doi:10.1371/journal.pone.0163365

S2. Anderson MR, Klink K, Cohrssen A. Evaluation of vaginal complaints. *JAMA*. 2004;291(11):1368–1379. doi:10.1001/jama.291.11.1368

S3. Allen-Davis JT, Beck A, Parker R, Ellis JL, Polley D. Assessment of vulvovaginal complaints: accuracy of telephone triage and in-office diagnosis. *Obstet Gynecol*. 2002;99(1):18–22. doi:10.1016/s0029-7844(01)01670-2

S4. Taylor SN. Cervicitis of unknown etiology. *Curr Infect Dis Rep*. 2014;16(7):409. doi:10.1007/s11908-014-0409-x

S5. Göttgens KW, Smeets RR, Stassen LP, Beets G, Breukink SO. The disappointing quality of published studies on operative techniques for rectovaginal fistulas: a blueprint for a prospective multi-institutional study. *Dis Colon Rectum*. 2014;57(7):888–898.

doi:10.1097/DCR.0000000000000147

S6. Akman S, Uygun V, Guven AG. Value of the urine strip test in the early diagnosis of bacterial peritonitis. *Pediatr Int*. 2005;47(5):523–527. doi:10.1111/j.1442-200x.2005.02119.x

S7. Makkena V, Bandi VK, Anandkumar DG, et al. Successful Tenckhoff catheter salvage in a patient with peritoneovesical fistula: A case report. *Clin Nephrol Case Stud*. 2019;7:17–22. Published 2019 Apr 16. doi:10.5414/CNCS109656

S8. De Dooy JJMI, van Wijk JAE, Plötz FB, Bökenkamp A. Recurrent pleural effusion during peritoneal dialysis: answer. *Pediatr Nephrol.* 2008;23(3):375–376. doi:10.1007/s00467-007-0590-3

S9. APA Szeto, Cheuk Chun; Chow, Kai Ming Pathogenesis and management of hydrothorax complicating peritoneal dialysis, *Current Opinion in Pulmonary Medicine*: July 2004 - Volume 10 - Issue 4 - p 315-319 doi: 10.1097/01.mcp.0000127901.60693.d0

S10. Ortiz L, Hazley D, Seikaly MG. Thoracocentesis helps diagnose diaphragmatic defects in peritoneal dialysis patients. *Pediatr Nephrol.* 2001;16(2):105–106. doi:10.1007/s004670000525

S11. Prischl FC, Muhr T, Seiringer EM, et al. Magnetic resonance imaging of the peritoneal cavity among peritoneal dialysis patients, using the dialysate as "contrast medium". *J Am Soc Nephrol.* 2002;13(1):197–203.

S12. Fujiwara M, Soda T, Okada T, Kanamaru H, Inoue T, Ogawa O. Bowel perforation by a peritoneal dialysis catheter: report of two cases. *BMC Nephrol.* 2017;18(1):312. Published 2017 Oct 16. doi:10.1186/s12882-017-0737-9
